# Supplementary material
Source: publisher figshare collection journal article supplement (https://aacr.figshare.com/articles/dataset/_/22651614)

Supplement Figure 1.

Supplementary Figure 1. Multi-institution cohort of patients with tumors harboring *EGFR* Exon 19 deletions. Primary analyses were performed on patients with tumors harboring E746\_A750del and L747\_A750>P, while investigation into additional uncommon variants was descriptive only. Patient numbers do not reflect the true prevalence of each variant since this cohort is selectively enriched for uncommon exon 19 deletions.

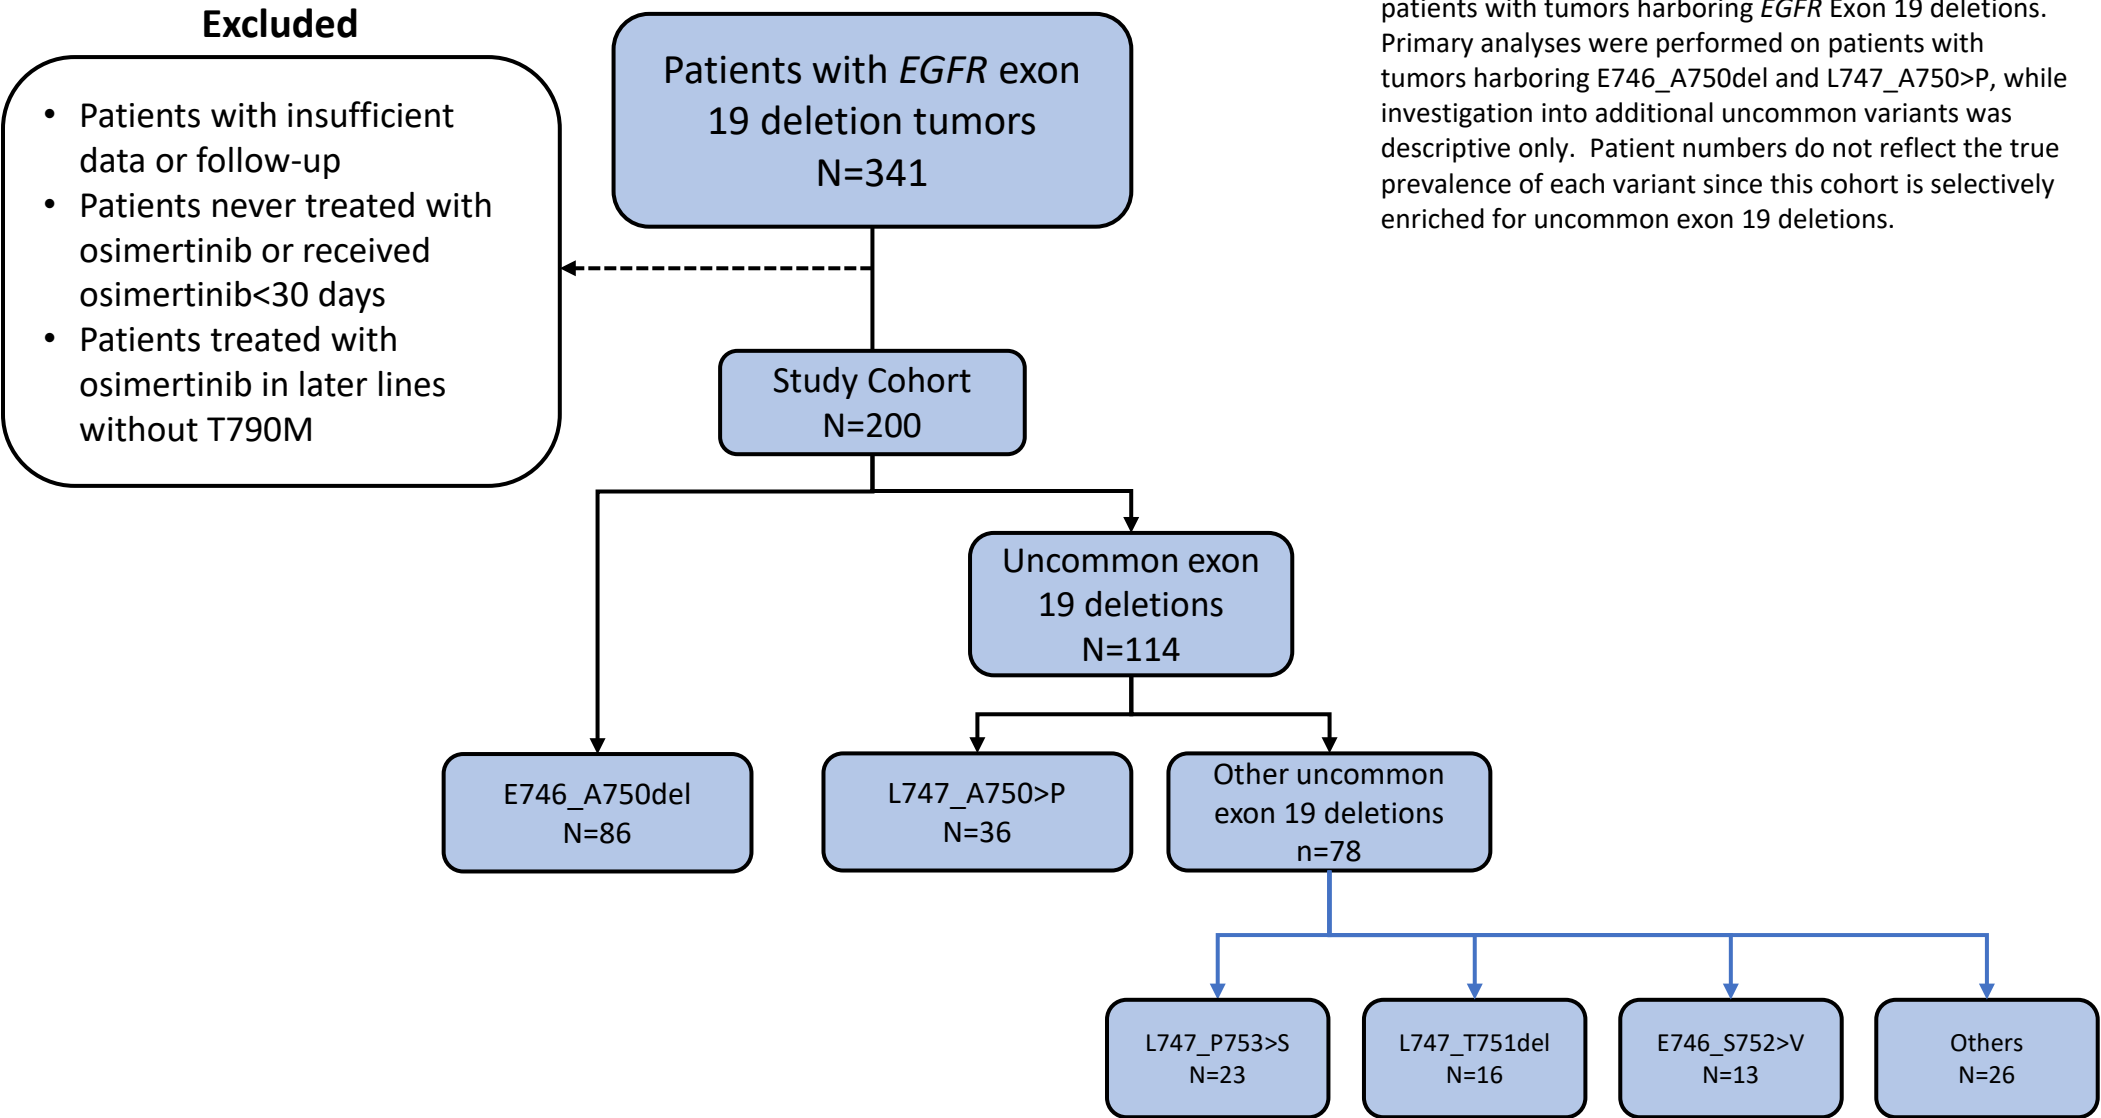

Supplement: Supplementary file 1 [file 40209273]
